# Supplementary material for: Developing a measure of mental health service satisfaction for use in low income countries: a mixed methods study
Source: Springer Nature journal article supplement (doi:10.1186/s12913-017-2126-2), 2017-03-09
Supplement: MOESM5 [file 12129226]

MENTAL HEALTH SERVICE SATISFACTION SCALE

ከዚህ ቀጥሎ የምጠይቅዎ በባለፈው ቀጠሮዎ ለህክምና በመጡ ጊዜ ከሃኪምዎ ጋር ስለነበረዎት ግንኙነትና ባገኙት የአእምሮ ሕክምና አገልግሎት ስለተሰማዎት የእርካታ መጠን በተመለከተ ነው። ስለዚህ እያንዳንዱን ጥያቄ እያነበብሁ ስጠይቅዎ ምን ያል እንደሚሰማሙ ወይም እንደማይሰማሙ እንዲነግሩኝ እጠይቅዎታለሁ።

|    |                                                                                |             |
|----|--------------------------------------------------------------------------------|-------------|
| 1  | ባለፈው ለህክምና በመጣሁ ጊዜ ሐኪሙ በትህትናና በአክብሮት አስተናግደውኛል።                                | በፍጹም አልሰማማም |
|    |                                                                                | አልሰማማም      |
|    |                                                                                | እስማማለሁ      |
|    |                                                                                | በጣም እስማማለሁ  |
| 2  | ባለፈው ለህክምና በመጣሁ ጊዜ ሐኪሙ በጥንቃቄ አዳምጠውኛል።                                          | በፍጹም አልሰማማም |
|    |                                                                                | አልሰማማም      |
|    |                                                                                | እስማማለሁ      |
|    |                                                                                | በጣም እስማማለሁ  |
| 3  | ባለፈው ለህክምና በመጣሁ ጊዜ ሐኪሙ እኔ ልረዳው በምችለው መንገድ ስለጤናየና ሕክምናዎ ሁኔታ አብራርተውልኛል።          | በፍጹም አልሰማማም |
|    |                                                                                | አልሰማማም      |
|    |                                                                                | እስማማለሁ      |
|    |                                                                                | በጣም እስማማለሁ  |
| 4  | ባለፈው ለህክምና በመጣሁ ጊዜ በአጠቃላይ ሆስፒታሉ/ጤና ጣቢያው ንጹህ ነበር።                               | በፍጹም አልሰማማም |
|    |                                                                                | አልሰማማም      |
|    |                                                                                | እስማማለሁ      |
|    |                                                                                | በጣም እስማማለሁ  |
| 5  | ባለፈው ለህክምና በመጣሁ ጊዜ የወረፋ መጠበቂያው አካባቢ ምቹ ነበር።                                    | በፍጹም አልሰማማም |
|    |                                                                                | አልሰማማም      |
|    |                                                                                | እስማማለሁ      |
|    |                                                                                | በጣም እስማማለሁ  |
| 6  | ባለፈው ለህክምና በመጣሁ ጊዜ ሽንት ቤቶቹ ንጹህ ነበሩ።                                            | በፍጹም አልሰማማም |
|    |                                                                                | አልሰማማም      |
|    |                                                                                | እስማማለሁ      |
|    |                                                                                | በጣም እስማማለሁ  |
| 7  | ባለፈው ለህክምና በመጣሁ ጊዜ ሐኪሙ ዘንድ ከመቅረቤ በፊት የጠበቅሁት ለረዥም ጊዜ አልነበረም።                    | በፍጹም አልሰማማም |
|    |                                                                                | አልሰማማም      |
|    |                                                                                | እስማማለሁ      |
|    |                                                                                | በጣም እስማማለሁ  |
| 8  | ባለፈው ለህክምና በመጣሁ ጊዜ ከሐኪሙ ጋር ስለ ችግሪ ለመወያየት በቂ ጊዜ ነበረኝ።                           | በፍጹም አልሰማማም |
|    |                                                                                | አልሰማማም      |
|    |                                                                                | እስማማለሁ      |
|    |                                                                                | በጣም እስማማለሁ  |
| 9  | ባለፈው ለህክምና በመጣሁ ጊዜ ስለ ጤናዬ ሁኔታ ልረዳው በምችለው መንገድ መረጃ ተሰጥቶኛል።                      | በፍጹም አልሰማማም |
|    |                                                                                | አልሰማማም      |
|    |                                                                                | እስማማለሁ      |
|    |                                                                                | በጣም እስማማለሁ  |
| 10 | ባለፈው ለህክምና በመጣሁ ጊዜ ጠቃሚ ወይም ገንቢ ምክር አግኝቻለሁ።                                     | በፍጹም አልሰማማም |
|    |                                                                                | አልሰማማም      |
|    |                                                                                | እስማማለሁ      |
|    |                                                                                | በጣም እስማማለሁ  |
| 11 | ባለፈው ለህክምና በመጣሁ ጊዜ የመድሃኒት ቤት፣የካርድ ክፍል፣የጥበቃ፣ወዘተ. ሰራተኞች በትህትናና በአክብሮት አስተናግደውኛል። | በፍጹም አልሰማማም |
|    |                                                                                | አልሰማማም      |
|    |                                                                                | እስማማለሁ      |
|    |                                                                                | በጣም እስማማለሁ  |
| 12 | ባለፈው ለህክምና በመጣሁ ጊዜ ሐኪሙ ቤተሰቤን ለኔ ጠቃሚ በሆነ መንገድ እንዲሳተፉ አድርገዋል።                    | በፍጹም አልሰማማም |
|    |                                                                                | አልሰማማም      |
|    |                                                                                | እስማማለሁ      |
|    |                                                                                | በጣም እስማማለሁ  |

Mental health service satisfaction scale (continued)

|    |                                                                            |                                               |
|----|----------------------------------------------------------------------------|-----------------------------------------------|
| 13 | በዚህ ሆስፒታል/ጤና ጣቢያ ከሐኪሙ ጋር በግሌ (ሌላ ሰው ሳይኖር) መነጋገር እችላለሁ።                     | በፍጹም አልሰማማም<br>አልሰማማም<br>እስማማለሁ<br>በጣም እስማማለሁ |
| 14 | በዚህ ሆስፒታል/ጤና ጣቢያ የክትትል ቀጠሮቹን ከአንድ ሐኪም ወይም ከማውቀው ባለሙያ ጋር ብቻ የመከታተል እድል አለኝ። | በፍጹም አልሰማማም<br>አልሰማማም<br>እስማማለሁ<br>በጣም እስማማለሁ |
| 15 | በዚህ ሆስፒታል/ጤና ጣቢያ ሐኪሙም ሆኑ ሌሎች ባለሙያዎች ግላዊ መረጃዬን በምስጢር ይይዛሉ።                  | በፍጹም አልሰማማም<br>አልሰማማም<br>እስማማለሁ<br>በጣም እስማማለሁ |
| 16 | ከዚህ ሆስፒታል/ጤና ጣቢያ አስፈላጊ ሲሆን ወደ እስፔሻሊስት መላክ ይቻላል።                            | በፍጹም አልሰማማም<br>አልሰማማም<br>እስማማለሁ<br>በጣም እስማማለሁ |
| 17 | በዚህ ሆስፒታል/ጤና ጣቢያ የማገኘው ህክምና የአእምሮ ህመም ምልክቶቼን በደንብ ያስታግስልኛል።                | በፍጹም አልሰማማም<br>አልሰማማም<br>እስማማለሁ<br>በጣም እስማማለሁ |
| 18 | በዚህ ሆስፒታል/ጤና ጣቢያ የሚሰጠው ህክምና የአእምሮ ህመሜ እንዲያገረሽ እየረዳኝ ነው።                    | በፍጹም አልሰማማም<br>አልሰማማም<br>እስማማለሁ<br>በጣም እስማማለሁ |
| 19 | በዚህ ሆስፒታል/ጤና ጣቢያ የሚሰጠው ህክምና ሠርቼ ገቢዬ እንዲሻሻል ረድቶኛል።                          | በፍጹም አልሰማማም<br>አልሰማማም<br>እስማማለሁ<br>በጣም እስማማለሁ |
| 20 | በዚህ ሆስፒታል/ጤና ጣቢያ የሐኪም እርዳታ በምፈልግበት ጊዜ ሁሉ ማግኘት እችላለሁ።                       | በፍጹም አልሰማማም<br>አልሰማማም<br>እስማማለሁ<br>በጣም እስማማለሁ |
| 21 | ወደ ሆስፒታሉ/ጤና ጣቢያው ለመምጣት ቀላል ነበር።                                            | በፍጹም አልሰማማም<br>አልሰማማም<br>እስማማለሁ<br>በጣም እስማማለሁ |
| 22 | በሆስፒታሉ/ጤና ጣቢያው ተገኝቶ ለመታከም በቂ ጊዜ ነበረኝ።                                      | በፍጹም አልሰማማም<br>አልሰማማም<br>እስማማለሁ<br>በጣም እስማማለሁ |
| 23 | ወደ ሆስፒታል/ጤና ጣቢያ መጥቶ ለመታከም በቂ ገንዘብ ነበረኝ።                                    | በፍጹም አልሰማማም<br>አልሰማማም<br>እስማማለሁ<br>በጣም እስማማለሁ |
| 24 | ቤተሰቦቼ ወይም ጓደኞቼ ተመሳሳይ የጤና እንክብካቤ/እርዳታ ቢያስፈልጋቸው ይህንን አገልግሎት እንዲጠቀሙ እመክራለሁ።   | በፍጹም አልሰማማም<br>አልሰማማም<br>እስማማለሁ<br>በጣም እስማማለሁ |
